# Supplementary material for: Photoinduced change in the shape of azobenzene-based molecular glass particles fixed in agar gel
Source: Royal Society of Chemistry journal article supplement (doi:10.1039/c6ra05792f), 2016-01-01
Supplement: c6ra05792f1.pdf [file c6ra05792f1.pdf]

# Photoinduced shape change of azobenzene-based molecular glass particles fixed in agar gel

*Ryota Ichikawa and Hideyuki Nakano\**

## Legends of Supplementary Videos

**Video 1.avi** This file contains supplementary Video 1, which shows the shape change of BFIAB particles fixed in an agar gel upon irradiation with horizontally polarized laser beam (488 nm, 15 mW) for 60 min, being shortened to ca. 8 s.

**Video 2.avi** This file contains supplementary Video 2, which shows the shape change of horizontally elongated BFIAB particles (as the end of Video 1) upon irradiation with vertically polarized laser beam (488 nm, 15 mW) for 60 min, being shortened to ca. 8 s.
